# Supplementary material for: Paradoxical Role of Glypican-1 in Prostate Cancer Cell and Tumor Growth
Source: PubMed Central journal article supplement (PMC6685992; doi:10.1038/s41598-019-47874-2), 2019-08-07
Supplement: 41598_2019_47874_MOESM1_ESM.pdf [file 41598_2019_47874_MOESM1_ESM.pdf]

# Paradoxical Role of Glypican-1 in Prostate Cancer Cell and Tumor Growth

Nhat D. Quach<sup>1,5</sup>, Sukhneeraj Pal Kaur<sup>1</sup>, Matthew Eggert<sup>2</sup>, Lishann Ingram<sup>1</sup>, Deepraj Ghosh<sup>5</sup>, Sheela Sheth<sup>4</sup>, Tamas Nagy<sup>3</sup>,

Michelle R. Dawson<sup>5,6,7</sup>, Robert D. Arnold<sup>2,8</sup>, Brian S. Cummings<sup>1,8,\*</sup>.

<sup>1</sup>*Department of Pharmaceutical and Biomedical Sciences, College of Pharmacy, University of Georgia, Athens, GA, USA*

<sup>2</sup>*Department of Drug Discovery & Development, Auburn University, Auburn, AL, USA*

<sup>3</sup>*Department of Pathology, College of Veterinary Medicine, University of Georgia, Athens, GA, US*

<sup>4</sup>*Medical College of Georgia, Augusta University, Augusta, GA, USA*

<sup>5</sup>*Department of Molecular Pharmacology, Physiology, & Biotechnology, Brown University, Providence, RI, USA*

<sup>6</sup>*Center for Biomedical Engineering, Brown University, Providence, RI, USA.*

<sup>7</sup>*School of Engineering, Brown University, Providence, RI, USA*

<sup>8</sup>*Interdisciplinary Toxicology Program, University of Georgia, Athens, GA, USA*

\*Corresponding Author

336 College of Pharmacy South  
University of Georgia  
Athens, GA 30607  
Phone: 706-542-3792  
Fax: 706-542-5358  
E-Mail: briansc@uga.edu

**Key words:** Glypican-1, prostate cancer, tumor microenvironment, prostate, bone marrow-derived mesenchymal stem cells, fibroblasts.

**Supplemental Figure 1: Effect of GPC-1 Inhibition on GPC-1 Expression and Cell Growth and Morphology in DU-145 Cells.** **A.** DU-145 cells were transfected with GPC-1 shRNA (Genecopoeia, Rockville, MD) prior to analysis of GPC-1 expression using immunoblot analysis. Effect of GPC-1 inhibition on DU-145 cells morphology (**B**), proliferation (**C**) and migration (**D**) were assessed using phase contrast microscopy, crystal violet staining (11 days) and scratch assays, respectively. Data in **C** and **D** are presented as the mean  $\pm$  the S.E.M. of at least 3 ( $n = 3$ ) separate passages. \*Indicates a significant difference ( $p < 0.05$ ) as compared to control as determined using a Student t-test.

**Supplemental Figure 2: Effect of GPC-1 Inhibition on the Expression of GPC Isoforms.** qRT-PCR was used to measure the mRNA expression level of GPC isoforms in PC-3 (**A**) and DU-145 (**B**) cells transfected with GPC-1 shRNA (Sigma, St. Louis, MO). Data are presented as the mean  $\pm$  the S.E.M. of at least 3 ( $n = 3$ ) separate passages. \*Indicates a significant difference ( $p < 0.05$ ) as compared to control as determined using a Student t-test.

**Supplemental Figure 3: Effect of GPC-1 Inhibition Using Different shRNA Plasmid Sequences on Prostate Cancer Cell Growth and Morphology.** **A.** Effect of GPC-1 shRNAs (Sigma, St. Louis, MO) on expression of GPC-1 in PC-3 cells. **B.** Effect of GPC-1 inhibition on cell morphology visualized by crystal violet staining at low density. **C.** Changes in cell growth in GPC-1 knockdown PC-3 cells visualized by crystal violet staining after 11 days of culture. **D.** Inhibition of GPC-1 results in decrease in cell migration in the scratch wound assay as visualized by crystal violet staining. Data in **C** and **D** are representative of at least 3 separate experiments with at least 3 independent cell passages. Data in **C** and **D** are presented as the mean  $\pm$  the S.E.M. of at least 3 ( $n = 3$ ) separate passages. \*Indicates a significant difference ( $p < 0.05$ ) as compared to control as determined using a Student t-test.

**Supplemental Figure 4: H&E Staining of Tumor Section from Scrambled (A) and GPC-1 shRNA (B) Mouse xenografts.** Data in **A** and **B** are representative of at least three individual mice. The scale bar indicates 50  $\mu\text{m}$ .

**Supplemental Figure 5: Ki-67 Expression in Tumor Sections from Scrambled (A) and GPC-1 shRNA (B) Mouse Xenografts.** Data in **A** and **B** are representative of at least 3 separate mice. Data in **C** are presented as the mean  $\pm$  S.E.M. of at least 5 separate images taken from at 5 different section of each tumor slice. The scale bar in **A** and **B** indicates 50  $\mu\text{m}$ .

**Supplemental Figure 6: E-Cad and N-Cad Staining in Tumor Sections from Scrambled (A) and GPC-1 shRNA (B) Mouse Xenografts.** Data in **A** and **B** are representative of at least 3 individual mice. E-Cad staining is indicated by red fluorescence while N-Cad is indicated by green. The scale bar indicates 50  $\mu\text{m}$ .

**Supplemental Figure 7: Effect of GPC-1 Inhibition on MMP9/2 Activity.** TCM from control PC-3 cells (scrambled shRNA) and from GPC-1 shRNA cells were collected and applied to confluent Hs27 and hMSCs at confluence for 24 hours. Media from these stromal cells were collected for MMP-9 and 2 activity analysis using gelatin zymography.

**Supplemental Figure 8: GPC-1 mRNA Expression Profile in Human Prostate Cancer Patients and Correlation to Prostate Cancer Patient Survival.** A TCGA Prostate Cancer (PRAD) cohort of 550 patients was analyzed using the UCSC Xena Cancer Database (<http://xena.ucsc.edu/>). Gene expression RNAseq (polyA+ IlluminaHiSeq pancan normalized) was selected to analyze GPC-1 expression in solid normal and primary prostate tissue samples (**A**). Kaplan-Meier Survival Curves were generated for these same patients (**B**) using the default Xena database algorithm. Even though the statistical log-ranked test ( $p= 0.9387$ ) does not indicate significant correlation between patient with high and low GPC-1 expression, patients with low expression of GPC-1 (blue lines) had a lower survival rate compared to high GPC-1 expressing patients (highlighted region).

**Supplemental Figure 9: Full western blot images used in Figure 1 and 2**

**Supplemental Figure 10: Full western blot images used in Figure 5**

**Supplemental Figure 11: Full western blot images used in Supplementary Figure 1 and 2.**

# Supplemental Figure 1

## A. Immunoblot Analysis

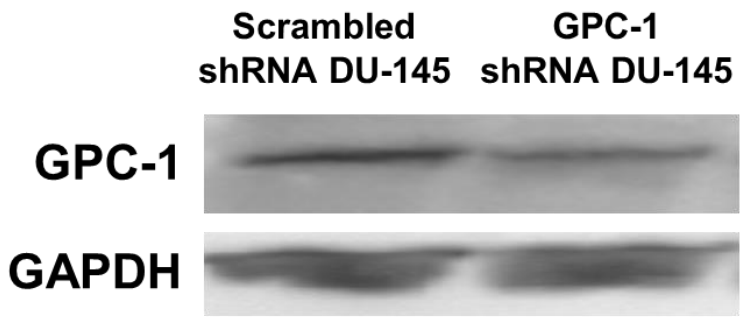

## B. Cell Morphology

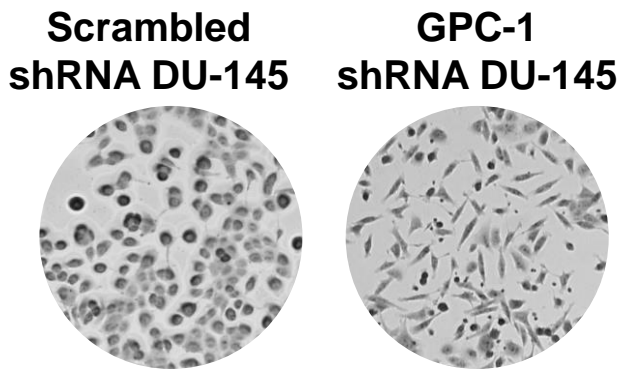

## C. Cell Proliferation

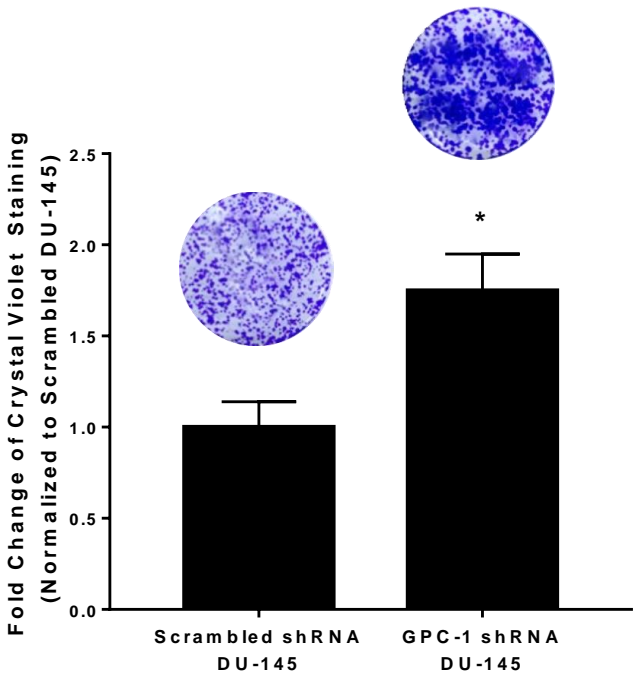

## D. Cell Migration

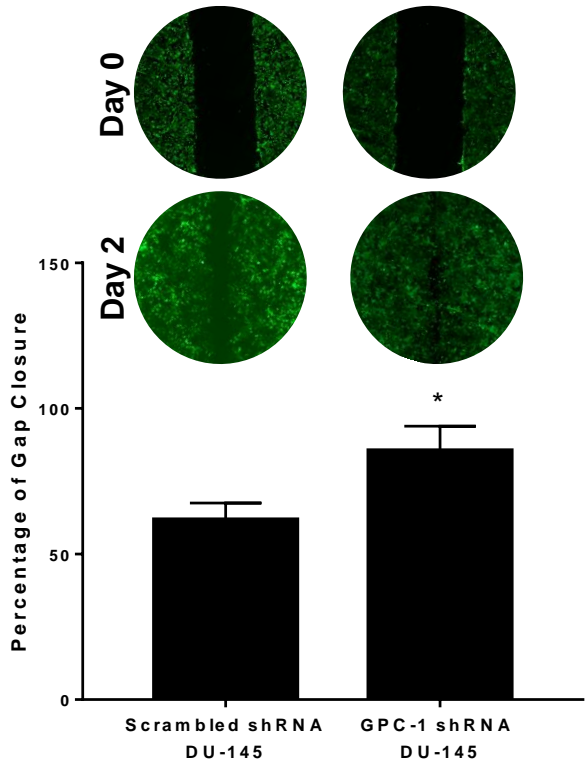

# Supplemental Figure 2

**A.**

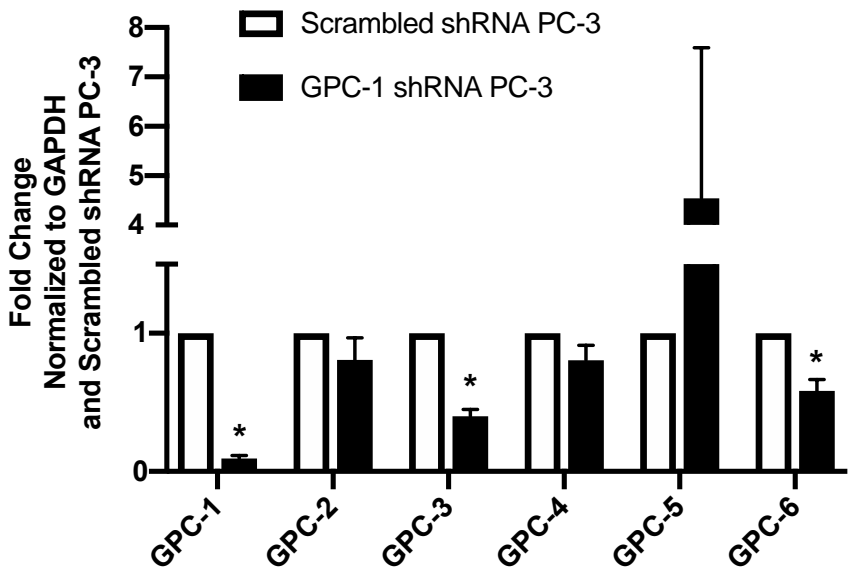

**B.**

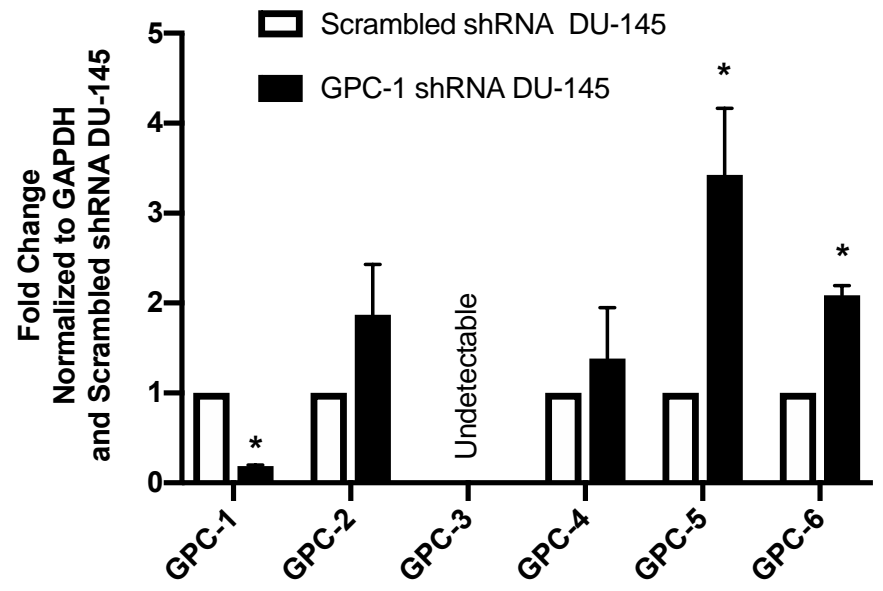

# Supplemental Figure 3

## A. Immunoblot Analysis

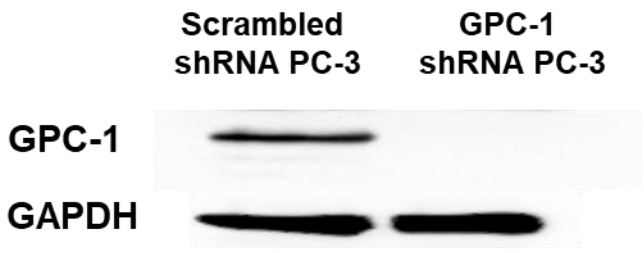

## B. Cell Morphology

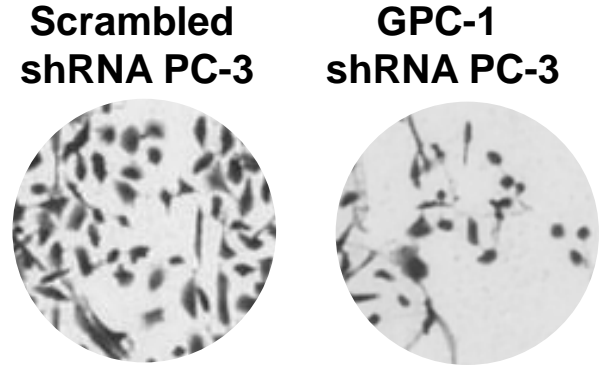

## C. Cell Proliferation

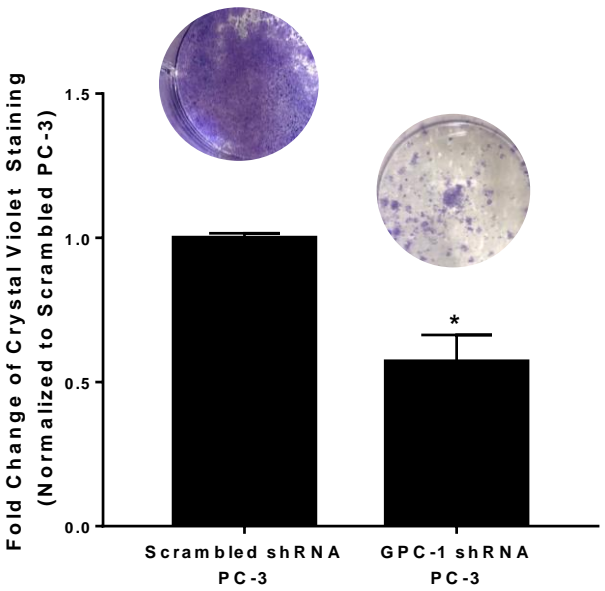

## D. Cell Migration

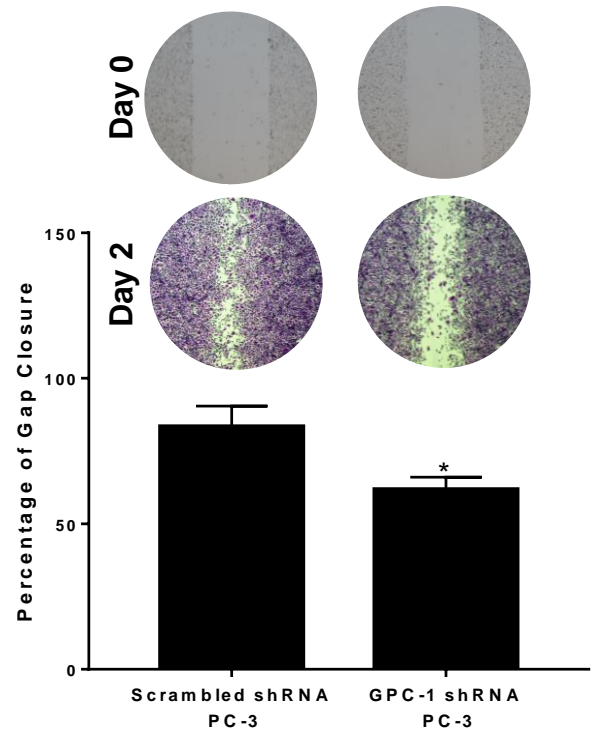

# Supplemental Figure 4

**A. Scrambled shRNA PC-3**

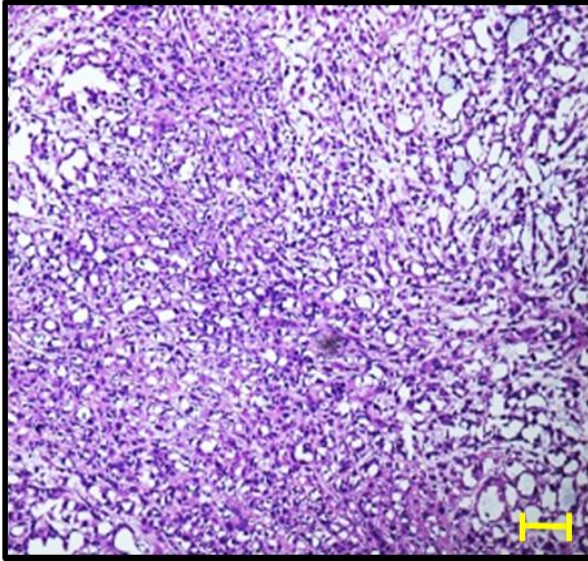

**B. GPC-1 shRNA PC-3**

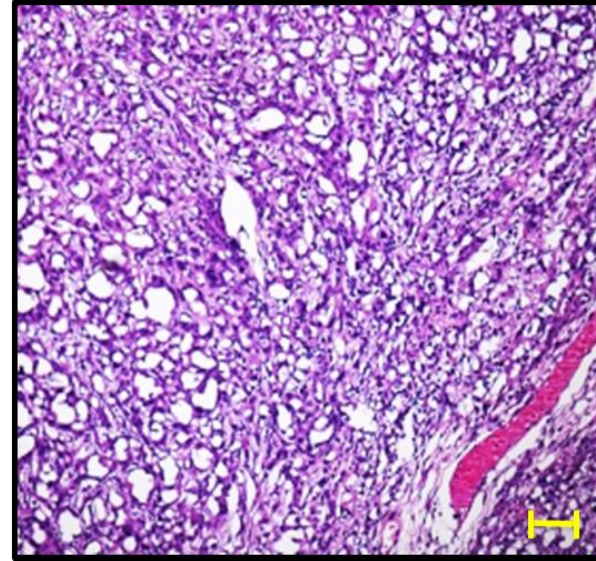

# Supplemental Figure 5

**A. Scrambled shRNA PC-3**

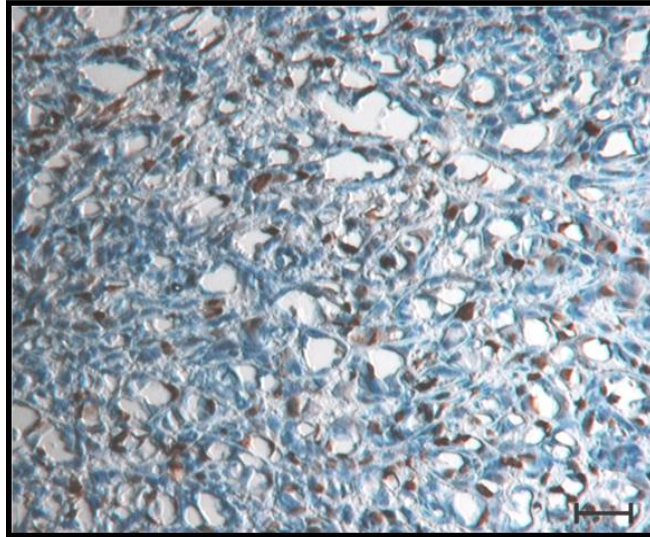

**B. GPC-1 shRNA PC-3**

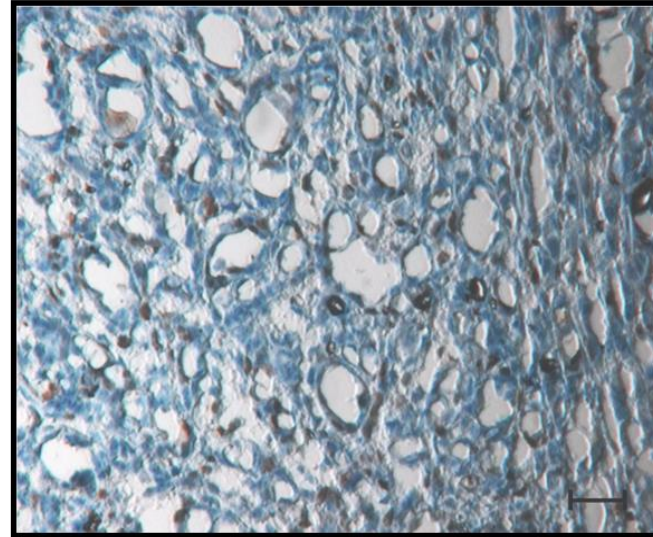

**C.**

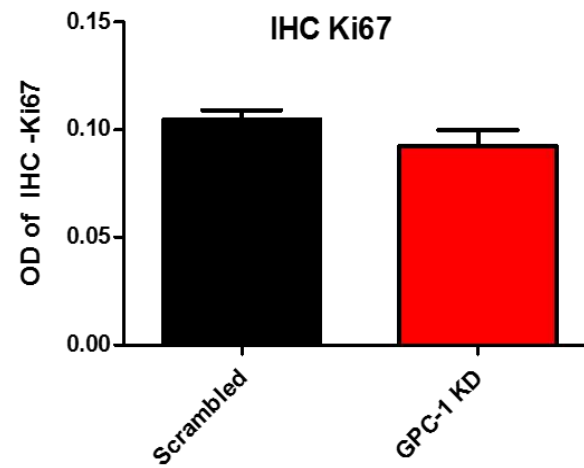



# Supplemental Figure 6

**A. Scrambled shRNA PC-3**

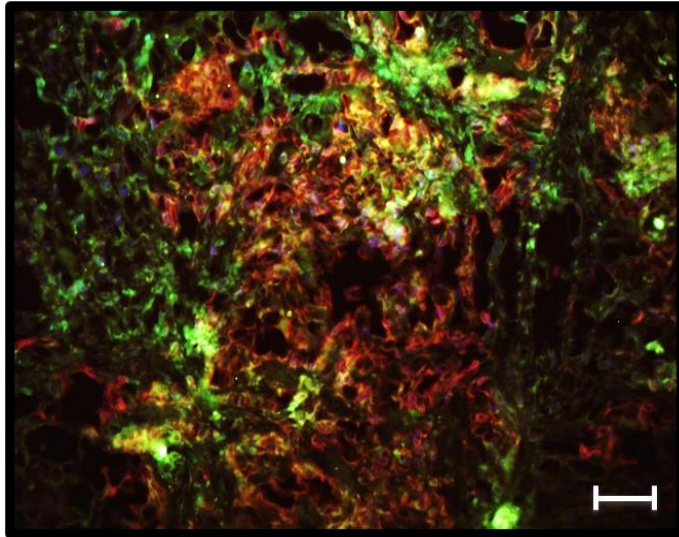

**B. GPC-1 shRNA PC-3**

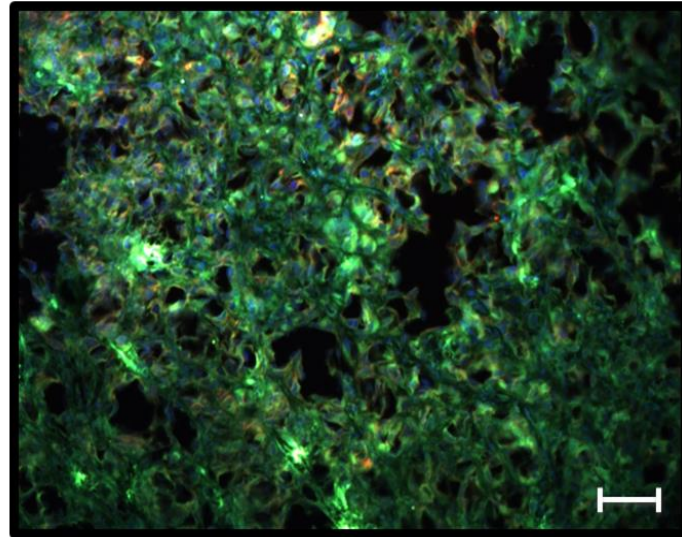

ECad/ NCad

**Supplemental Figure 7**

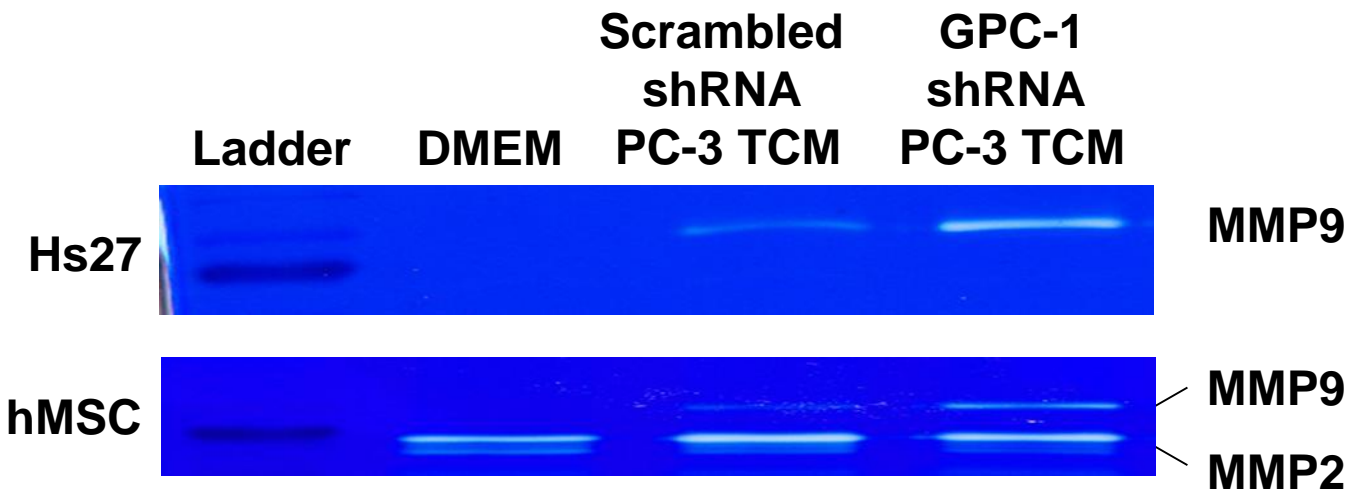

# Supplemental Figure 8

**A.**

**GPC-1 mRNA Expression of Prostate Tissues**  
**Primary Tumor: 496**  
**Solid Normal Tissue: 54**

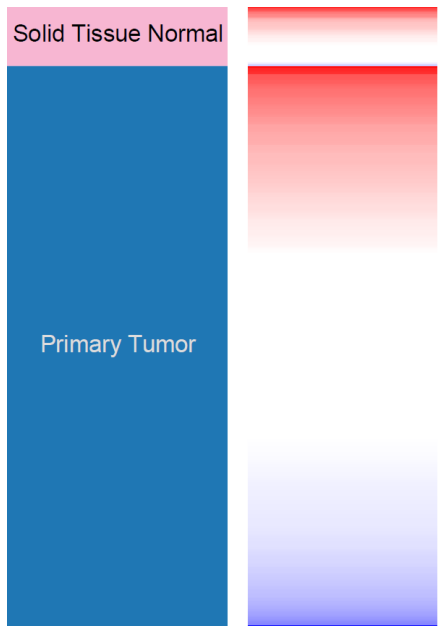

| Sample Type       | mRNA Expression in Color Gradient |
|-------------------|-----------------------------------|
| Solid Tissue Norm | 2.4                               |
| Metastatic        | 0.78                              |
| Primary Tumor     | 0.25                              |
| null (no data)    | -3                                |
|                   | null (no data)                    |

**B.**

**Kaplan-Meier Survival Curves of Prostate Cancer Patients**

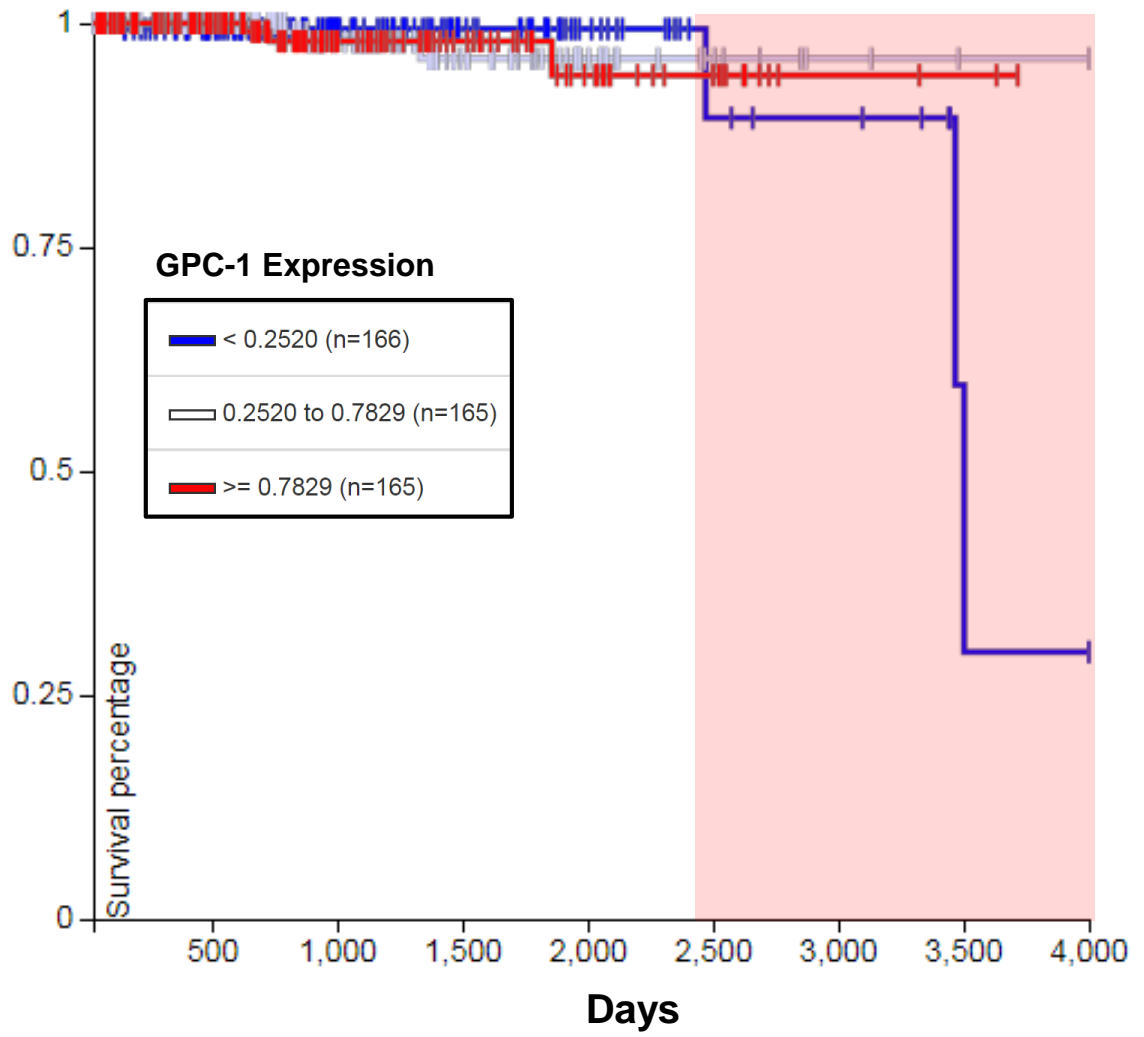

# Supplemental Figure 9

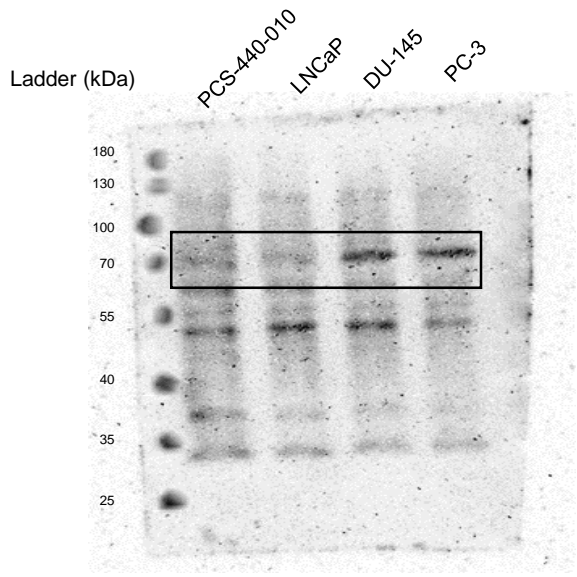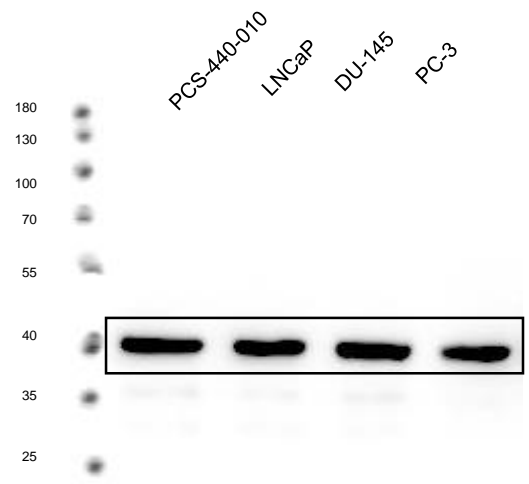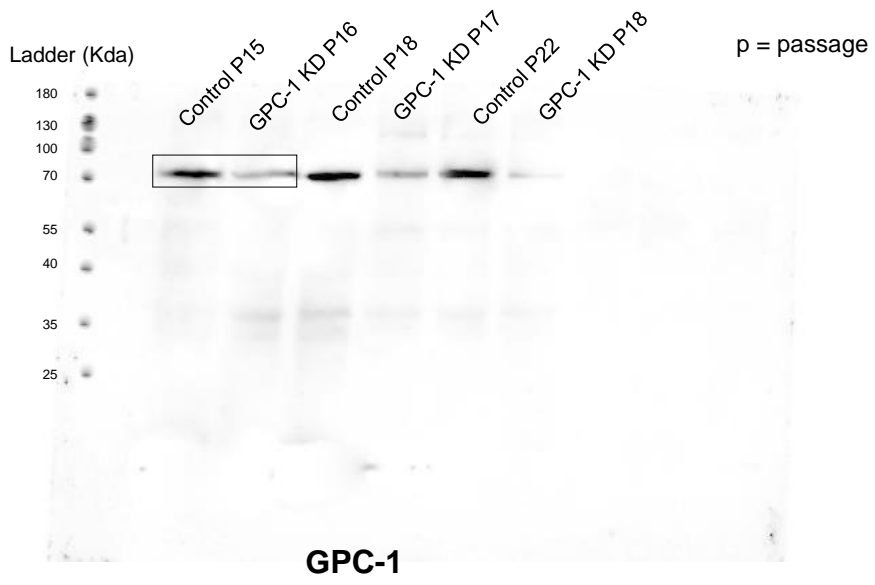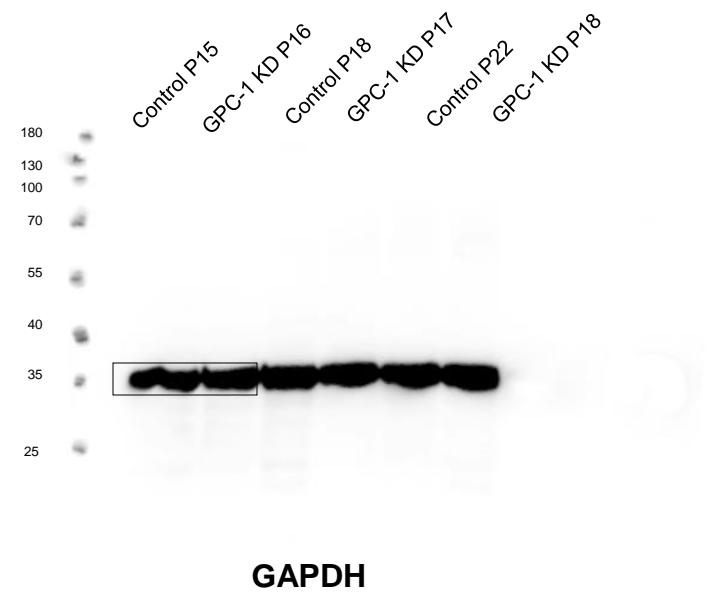

# Supplemental Figure 10

## Legend

- 1 – Control tumor M1
- 2 – GPC-1 KD tumor M3
- 3 – Control Tumor M2
- 4 – GPC-1 KD tumor M4

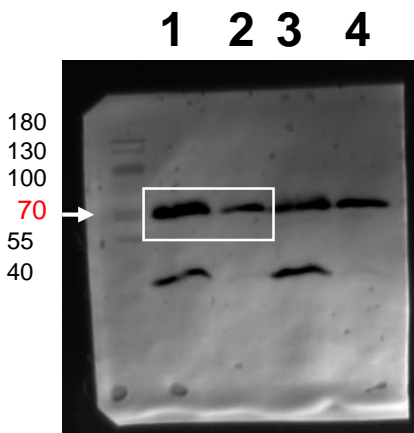

GPC-1

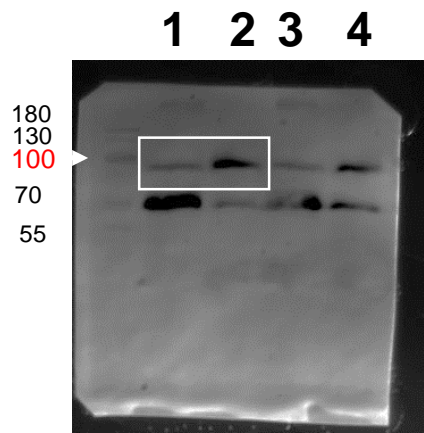

MMP9

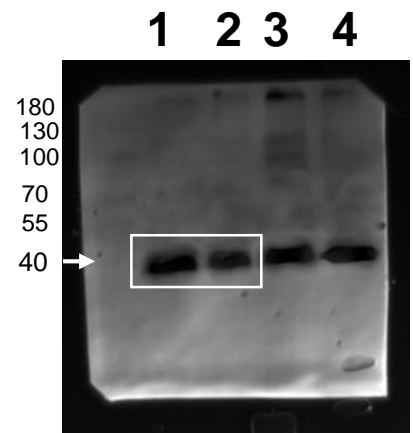

GAPDH

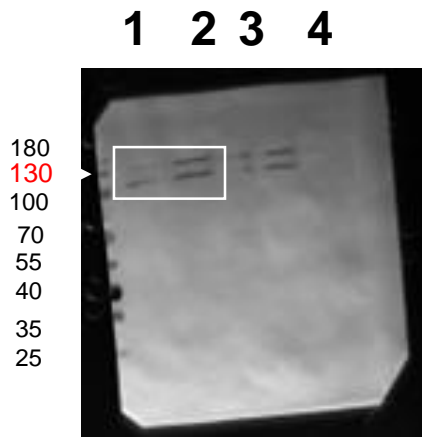

NCAD

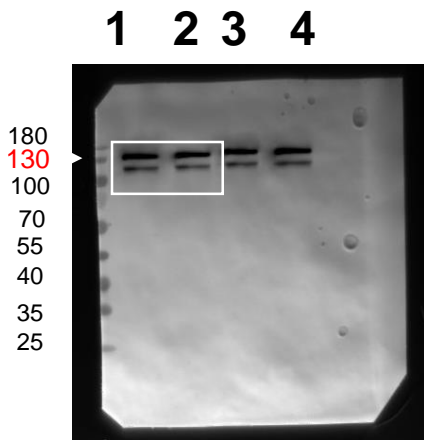

ECAD

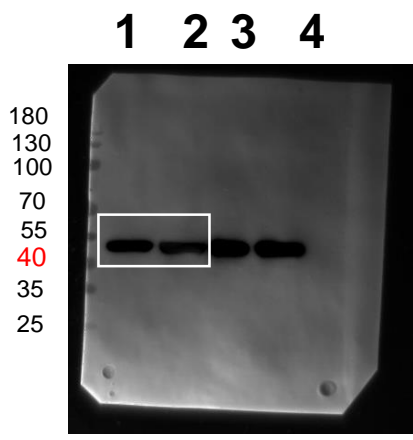

GAPDH

# Supplemental Figure 11

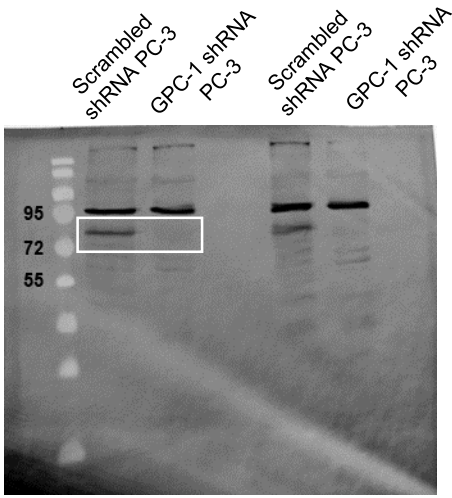

GPC-1

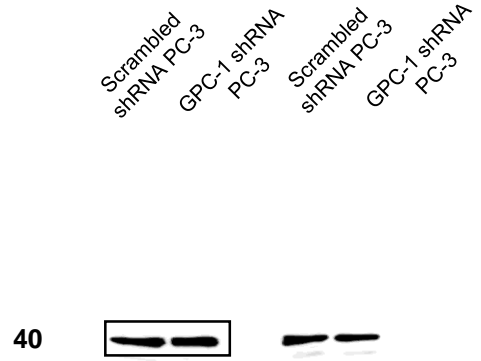

GAPDH

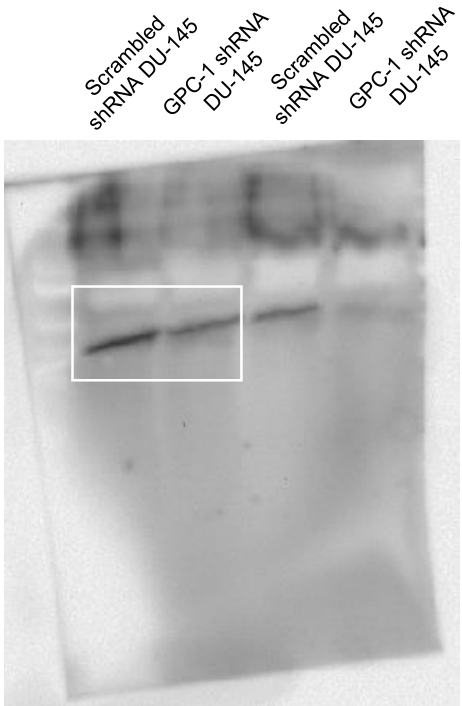

GPC-1

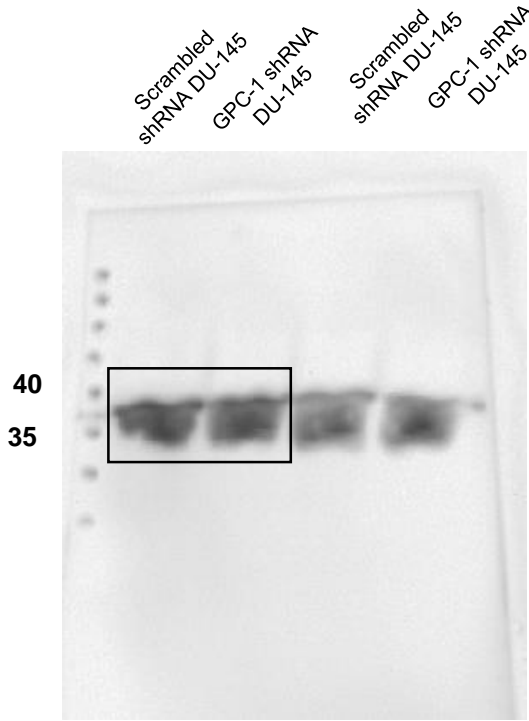

GAPDH
